# Supplementary material for: Reduction pathway-dependent cytotoxicity of reduced graphene oxide
Source: Royal Society of Chemistry journal article supplement (doi:10.1039/c8en00242h), 2018-01-01
Supplement: c8en00242h1.pdf [file c8en00242h1.pdf]

# Reduction pathway-dependent cytotoxicity of reduced graphene oxide†

Qiurong Zhang,<sup>a</sup> Xiaolei Liu,<sup>a</sup> Hongyan Meng,<sup>a</sup> Sijin Liu,<sup>b</sup> and Chengdong Zhang<sup>\*ca</sup>

<sup>a</sup> College of Environmental Science and Engineering, Nankai University, Tianjin 300350, China.

<sup>b</sup> State Key Laboratory of Environmental Chemistry and Ecotoxicology, Research Center for Eco-Environmental Sciences, Chinese Academy of Sciences, Beijing 100085, China.

<sup>c</sup> School of Environment, Beijing Normal University, Beijing 100857, China. E-mail: [zhangchengdong@bnu.edu.cn](mailto:zhangchengdong@bnu.edu.cn)

† Electronic supplementary information (ESI) available. See DOI:

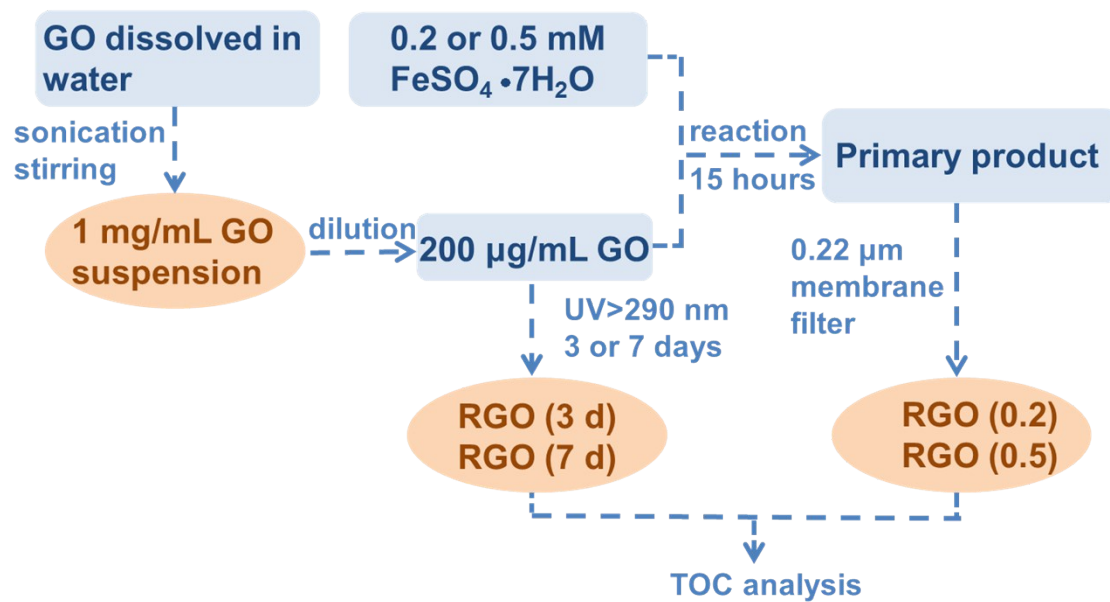

**Fig. S1** Scheme of reduction procedures.

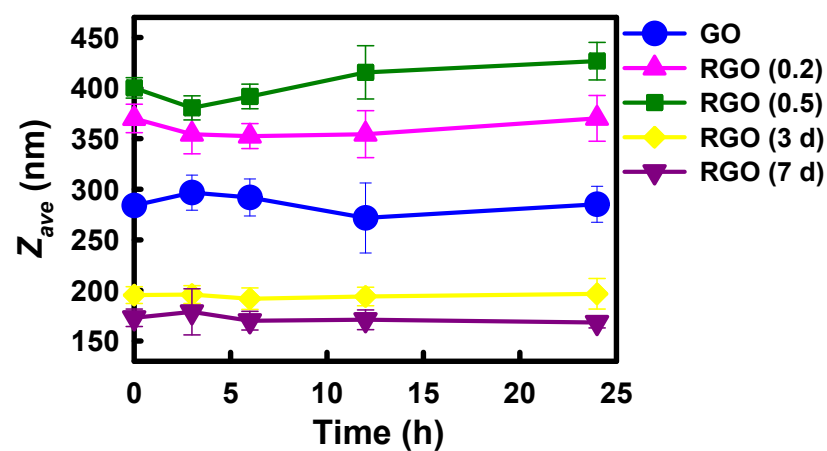

**Fig. S2** The change of nanoparticle size with time. Twenty  $\mu\text{g/mL}$  of GO/RGOs was incubated in culture medium and the size was analyzed by DLS ( $n=3$ ).

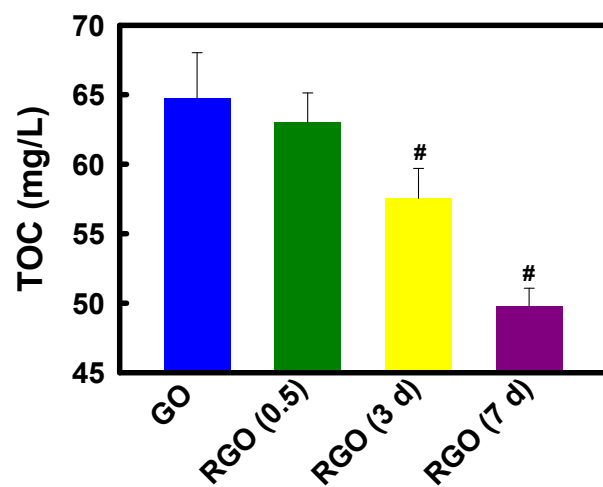

**Fig. S3** Changes of TOC concentration in GO/RGOs colloidal solution after transformation (n=3). The suspension was sonicated for 30 min before analysis to ensure no precipitation occurring. #,  $p < 0.05$  compared to initial GO concentration.

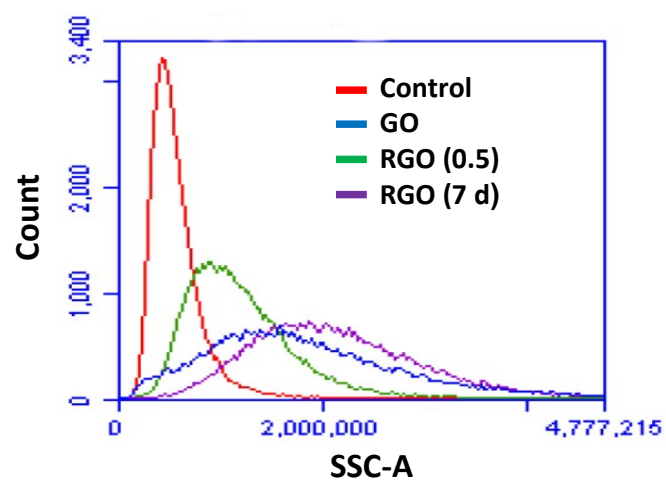

**Fig. S4** Representative side-scatter histogram profile of cells after exposure to 20  $\mu\text{g/mL}$  GO/RGOs for 24 h

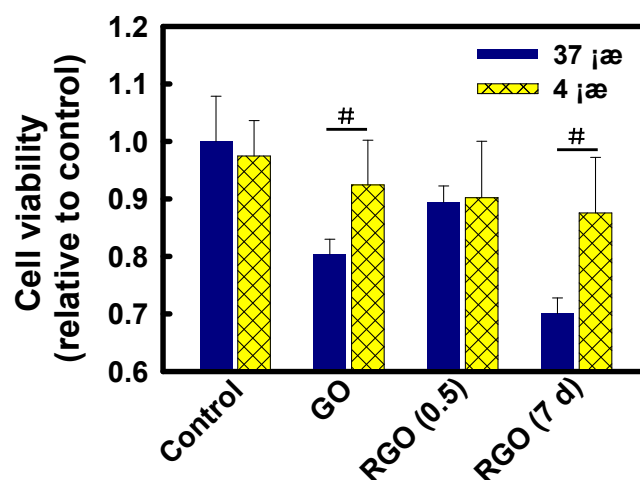

**Fig. S5** The effects of temperature on cell viability in the presence of GO/RGOs. Cells were exposed to 20  $\mu\text{g/mL}$  GO/RGOs for 24 h at indicated temperature ( $n=5$ ). <sup>#</sup>,  $p < 0.05$  relative to the same treatment at 37 °C.

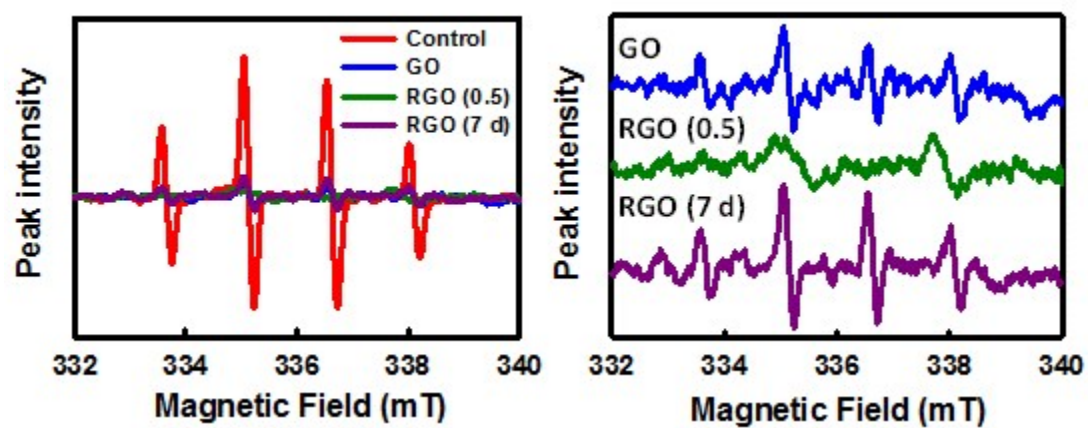

**Fig. S6** EPR spectra showing the radical scavenging activity of GO/RGOs. The left panel shows the overall EPR spectra, and the right panel enlarges the differences among three nanoparticles.
